# Supplementary material
Source: Research Square preprint supplement (doi:10.21203/rs.3.rs-9213593/v1)
Supplement: Supplementary file 1 [file b4d2700f2149695bf1699a6d.docx]

**Supplemental Materials**

**Florarozone targets P2Y12 to regulate AMPKα2 expression to ameliorate doxorubicin-induced heart failure**

***Detailed Materials and Methods***

*Materials*

Floralozone was obtained from Shanghai Jiulin Co., Ltd (Shanghai, China). Dorsomorphin (NO: HY-13418A) and AZD6140 (Ticagrelor, HY-10064) were obtained from MedChemexpress (Monmouth Junction, NJ, USA). Malondialdehyde (MDA) assay kit (TBA method), and Total superoxide dismutase (SOD) assay kit (hydroxylamine method) were purchased from Wanleibio (Shenyang, China). Brain natriuretic peptide (BNP, H166) and reduced glutathione (GSH, A006-2-1) were purchased from Nanjing Jiancheng Institute of Biological Engineering (Nanjing, Jiangsu, China). Senescence-Associatedβ-Galactosidase（SA-β-Gal） Stain Kit and Hematoxylin-Eosin (HE) Stain Kit were procured from Solarbio (Beijing, China). NOX2 Antibody (DF6520) and NOX4 Antibody (DF6924) c Affinity Bioscience (Jiangsu, China). Anti-MEK3 (ab195037), Anti-AMPK alpha 2 (ab97275), Anti-ASK1 (ab45178), Anti-gamma H2A.X (phosphor-S139) (ab26350), and Anti-Ki67 (ab16667) was purchased from Abcam (Shanghai, China). DyLight 554 Phalloidin#13054 (red) and DyLight 488 Phalloidin#12935 (green) were procured from Cell Signaling (Shanghai, China). Phospho-P53 (Ser15) Polyclonal antibody (28961-1-AP) and P21 Polyclonal antibody(10355-1-AP) were acquired from Proteintech (Wuhan, China). Anti-P2Y12 Receptor Antibody (APR-012) was purchased from Alomone Labs (Jerusalem, Israel).

*Animal Experiment Design*

SD rats and C57BL/6J mice were purchased from the Henan Provincial Experimental Animal Center (Zhengzhou, China). They were housed in a pathogen-free environment under a temperature controlled at (22±1°C) and humidity (60±5%) with a 12-h light/dark cycle with free access to food and water. The Xinxiang Medical University Ethics Committee evaluated and approved the animal protocol (No: XYLL—2023YY223). The National Institutes of Health's Guide for the Care and Use of Laboratory Animals was strictly followed in executing all studies.

In vivo animal experiments are conducted in the following three parts:

1. SD rats were randomly divided into 4 groups (Control group, Control+Floralozone group, DOX group DOX+Floralozone group), with 8 rats in each group. Doxorubicin (2.5mg/kg/week)[1] intraperitoneal injection (*i.p.*) for 6 weeks. Floralozone (150mg/kg/day)[2] gavage for 6 weeks.
2. C57 mice were randomly divided into 4 groups (AZD6140 group, AZD6140+Floralozone group, Dorsomorphin group, Dorsomorphin+Floralozone group), with 8 mice in each group. Floralozone (240mg/kg/day), gavage for 6 weeks. Dorsomorphin (AMPK inhibitor, 10mg/kg) [3] was dissolved in DMSO once a week intraperitoneal injection for 6 consecutive weeks. AZD6140 (P2Y12 inhibitor, 12mg/kg) [4] intraperitoneal injection (*i.p.*), twice a week, for 6 consecutive weeks.
3. AMPKα2-/- knockout mice were randomly divided into 2 groups (AMPKα2-/- group, AMPKα2-/-+ Floralozone group), with 8 mice in each group. Floralozone (240mg/kg/day)[2] gavage for 6 weeks.

## *Cell experiments*

Rat cardiomyocytes (H9C2 cells) were purchased from the Shanghai Yihe Applied Biotechnology Company (Shanghai, China) and cultured in Dulbecco's modified eagle's medium (DMEM, Gibco, USA) supplemented with 10% fetal bovine serum (FBS, Zeta Life, USA) and 100 U/mL penicillin-streptomycin (NCM Biotech, Suzhou, China) at 37°C in a humidified atmosphere containing 5% CO2.

The cell experiment groups are as follows:

1. The pharmacodynamic experiment was divided into 4 groups (Vehicle group, Floralozone group, DOX group, DOX+Floralozone group). Incubate with DOX (1 μM) [1] for 24 hours and floralozone (100 μM)[2] for 24 hours.
2. Mechanism experiments were divided into 4 groups (AZD6140, AZD6140+Floralozone, Dorsomorphin, Dorsomorphin +Floralozone). Incubate with dorsomorphin (AMPK inhibitor, 10 μM) [5] for 24 hours and AZD6140 (P2Y12 inhibitor, 10 μM) [4] for 24 hours.

*Echocardiography*

The echocardiography was performed based on our previous research [1]. To comprehensively evaluate the structural and functional changes of rat hearts, after 6 weeks of administration with floralozone, SD rats were anesthetized with pentobarbital sodium (50 mg/kg, IP). After skin preparation left ventricular function was detected by ultrasound, with various indicators recorded.

*Determination of myocardial injury markers*

In order to evaluate the degree of myocardial injury and the therapeutic effect of drugs, we detected the content of BNP in rat serum and H9C2 cells according to the instructions of the corresponding commercial kit.

*Determination of in vivo and in vitro oxidative stress*

To further evaluate the level of oxidative stress, based on previous research, the levels of GSH, SOD, and MDA in serum and H9c2 cells were measured using commercially available reagent kits. Evaluate the production of ROS in vivo and in vitro through DHE staining.

*Pathological analysis*

Aim at observing the state of myocardial tissue structure and the degree of myocardial aging, the heart tissue is embedded in paraffin blocks and cut into 5 µm. Myocardial slices and H9C2 cells were stained with hematoxylin-eosin (H&E) and β-Perform pathological observation by staining with galactose.

*Immunohistochemistry (IHC)*

Paraffin sections of cardiac tissue were deparaffinized and subjected to thermal repair using 0.1M sodium citrate buffer (pH=6.0). Endogenous peroxidase activity was blocked by 3% hydrogen peroxide, and non-specific binding sites were blocked by 3% bovine serum albumin (BSA). Next, the P-γ-H2A.X antibody (diluted at 1:50) and Ki67 antibody (diluted at 1:200) were incubated overnight at 4 ℃. The next day, clean the slices with PBS and incubate them with the corresponding secondary antibody at 37 ℃ for 1.5 hours. Wash the slices with PBS, then incubate with DAB (3,3 '- diaminobenzidine) for 30 minutes, and finally treat with hematoxylin.

*Immunofluorescence (IF)*

5μm paraffin sections were dewaxed with xylene and dehydrated with ethanol. Heat and repair the antigen in the slice with 0.1M sodium citrate (pH=6.0) at a temperature of 95 degrees Celsius or above for 20 minutes. After sealing with 3% BSA, the slices were incubated overnight at 4 ℃ with primary antibodies against p-p53(diluted at 1:250), p21(diluted at 1:250), P2Y12(diluted at 1:50), AMPKα2(diluted at 1:200), ASK1(diluted at 1:250), and MEK3(diluted at 1:250). Subsequently, the cells were treated with corresponding fluorescent secondary antibodies at 37 ℃ for 1 hour and finally stained with DAPI for 4 minutes. The staining results of the slices were captured using a fluorescence microscope. Use Image-Pro Plus 6.0 analysis software to calculate the immunohistochemical positive expression level and the average fluorescence intensity of immunofluorescence staining.

*Western blot (WB)*

Heart tissue was added into the lysate, crushed in an ultrasonic cell grinder, separated by a cryogenic centrifuge, and total protein was extracted. After the content of protein was quantitatively determined by the BCA analysis kit, the same amount of total protein (20 micrograms) was separated by SDS-PAGE and then transferred to the PVDF membrane. The PVDF membrane was incubated with primary antibodies NOX2 (diluted at 1:2000), NOX4 (diluted at 1:2000), p-p53 (diluted at 1:2000), p-21 (diluted at 1:2000), P-γ-H2A.X (diluted at 1:2000), Ki67 (diluted at 1:200), P2Y12 (diluted at 1:200), AMPKα2 (diluted at 1:2000), ASK1 (diluted at 1:1000), and MEK3 (diluted at 1:2500) overnight at 4℃, and then the membrane was incubated with corresponding secondary antibodies for 2 hours at room temperature. Using GAPDH (diluted at 1:3000) as an internal reference, taking photos with a chemiluminescence imaging system, and analyzing the gray value of spots with Image-Pro Plus 6.0 software.

## References

[1] YIN Y, NIU Q, HOU H, et al. PAE ameliorates doxorubicin-induced cardiotoxicity via suppressing NHE1 phosphorylation and stimulating PI3K/AKT phosphorylation [J]. International immunopharmacology, 2022, 113: 109274.

[2] HUANG N, QIU Y, LIU Y, et al. Floralozone protects endothelial function in atherosclerosis by ameliorating NHE1 [J]. Acta biochimica et biophysica Sinica, 2021, 53(10): 1310-20.

[3] YU P, HONG C, SACHIDANANDAN C, et al. Dorsomorphin inhibits BMP signals required for embryogenesis and iron metabolism [J]. Nature chemical biology, 2008, 4(1): 33-41.

[4] WANG S, SUN M, DING S, et al. Ticagrelor reduces doxorubicin-induced pyroptosis of rat cardiomyocytes by targeting GSK-3β/caspase-1 [J]. Frontiers in cardiovascular medicine, 2022, 9: 1090601.

[5] DAI Q, ZHANG H, TANG S, et al. VDRVitamin D- (vitamin D receptor) alleviates glucose metabolism reprogramming in lipopolysaccharide-induced acute kidney injury [J]. Frontiers in physiology, 2023, 14: 1083643.
